# Supplementary material
Source: PubMed Central journal article supplement (PMC4360018)
Supplement: tableS1.pdf [file tableS1.pdf]

**Sorted by Rate (high to low)**

| Accession | protein                                                                      | CONTENT  | Fraction New | (%/day)  | (%/hr)   |
|-----------|------------------------------------------------------------------------------|----------|--------------|----------|----------|
| P02647    | Apolipoprotein A-I                                                           | 0.002102 | 1.043772325  | 3.727758 | 0.155323 |
| P04114    | Apolipoprotein B-100                                                         | 8.48E-07 | 0.983398346  | 3.512137 | 0.146339 |
| P01024    | Complement C3                                                                | 0.000195 | 0.949960215  | 3.392715 | 0.141363 |
| P08238    | Heat shock protein HSP 90-beta                                               | 8.65E-06 | 0.907438827  | 3.240853 | 0.135036 |
| P13693    | Translationally-controlled tumor protein                                     | 0.000112 | 0.85558437   | 3.055658 | 0.127319 |
| Q5VYK3    | Proteasome-associated protein ECM29 homolog                                  | 5.75E-06 | 0.852249826  | 3.043749 | 0.126823 |
| P08670    | Vimentin                                                                     | 2.23E-05 | 0.838467287  | 2.994526 | 0.124772 |
| P42704    | Leucine-rich PPR motif-containing protein, mitochondrial                     | 1.48E-05 | 0.760898971  | 2.717496 | 0.113229 |
| O60763    | General vesicular transport factor p115                                      | 2.17E-05 | 0.750286752  | 2.679596 | 0.11165  |
| Q13200    | 26S proteasome non-ATPase regulatory subunit 2                               | 9.2E-05  | 0.747955879  | 2.671271 | 0.111303 |
| O75155    | Cullin-associated NEDD8-dissociated protein 2                                | 0.000213 | 0.743857341  | 2.656633 | 0.110693 |
| P02787    | Serotransferrin                                                              | 0.000346 | 0.740949286  | 2.646247 | 0.11026  |
| P01009    | Alpha-1-antitrypsin                                                          | 0.001076 | 0.739732891  | 2.641903 | 0.110079 |
| Q9Y490    | Talin-1                                                                      | 6.07E-06 | 0.729269393  | 2.604534 | 0.108522 |
| P01023    | Alpha-2-macroglobulin                                                        | 0.000228 | 0.726955572  | 2.59627  | 0.108178 |
| Q00610    | Clathrin heavy chain 1                                                       | 1.17E-05 | 0.719345611  | 2.569091 | 0.107045 |
| P02790    | Hemopexin                                                                    | 0.000111 | 0.708844709  | 2.531588 | 0.105483 |
| Q9UN36    | Protein NDRG2                                                                | 1.88E-05 | 0.692342583  | 2.472652 | 0.103027 |
| Q9Y6B6    | GTP-binding protein SAR1b                                                    | 0.000106 | 0.688751461  | 2.459827 | 0.102493 |
| P54727    | UV excision repair protein RAD23 homolog B                                   | 2.44E-05 | 0.688354131  | 2.458408 | 0.102434 |
| P50993    | Sodium/potassium-transporting ATPase subunit alpha-2                         | 2.47E-05 | 0.678203489  | 2.422155 | 0.100923 |
| P38646    | Stress-70 protein, mitochondrial                                             | 0.000124 | 0.673320921  | 2.404718 | 0.100197 |
| Q16531    | DNA damage-binding protein 1                                                 | 7.35E-06 | 0.671022808  | 2.39651  | 0.099855 |
| P55072    | Transitional endoplasmic reticulum ATPase                                    | 0.000225 | 0.659740279  | 2.356215 | 0.098176 |
| O75251    | NADH dehydrogenase [ubiquinone] iron-sulfur protein 7, mitochondrial         | 2.1E-05  | 0.65660904   | 2.345032 | 0.09771  |
| P34932    | Heat shock 70 kDa protein 4                                                  | 0.000172 | 0.64367901   | 2.298854 | 0.095786 |
| P15090    | Fatty acid-binding protein, adipocyte                                        | 0.000483 | 0.625187974  | 2.232814 | 0.093034 |
| O00483    | NADH dehydrogenase [ubiquinone] 1 alpha subcomplex subunit 4                 | 0.005413 | 0.620566608  | 2.216309 | 0.092346 |
| P61026    | Ras-related protein Rab-10                                                   | 0.000191 | 0.619483386  | 2.212441 | 0.092185 |
| P17661    | Desmin                                                                       | 0.000398 | 0.619010314  | 2.210751 | 0.092115 |
| P02794    | Ferritin heavy chain                                                         | 0.001862 | 0.617861772  | 2.206649 | 0.091944 |
| P30153    | Serine/threonine-protein phosphatase 2A 65 kDa regulatory subunit A alpha is | 0.000395 | 0.612261843  | 2.186649 | 0.09111  |
| Q14558    | Heat shock protein beta-6                                                    | 0.003936 | 0.605462649  | 2.162367 | 0.090099 |
| Q8WUM4    | Programmed cell death 6-interacting protein                                  | 0.00015  | 0.603563275  | 2.155583 | 0.089816 |
| P05091    | Aldehyde dehydrogenase, mitochondrial                                        | 0.000217 | 0.595501213  | 2.12679  | 0.088616 |
| P01019    | Angiotensinogen                                                              | 5.84E-05 | 0.591606027  | 2.112879 | 0.088037 |
| P61981    | 14-3-3 protein gamma                                                         | 0.001078 | 0.581726428  | 2.077594 | 0.086566 |
| Q99460    | 26S proteasome non-ATPase regulatory subunit 1                               | 3.59E-05 | 0.572840081  | 2.045857 | 0.085244 |
| P30837    | Aldehyde dehydrogenase X, mitochondrial                                      | 6.63E-05 | 0.569821358  | 2.035076 | 0.084795 |
| Q9NZ08    | Endoplasmic reticulum aminopeptidase 1                                       | 1.69E-05 | 0.567279205  | 2.025997 | 0.084417 |
| P02768    | Serum albumin                                                                | 0.01313  | 0.566289229  | 2.022462 | 0.084269 |
| Q04446    | 1,4-alpha-glucan-branching enzyme                                            | 5.52E-05 | 0.562872073  | 2.010257 | 0.083761 |
| Q53GG5    | PDZ and LIM domain protein 3                                                 | 0.002118 | 0.559777104  | 1.999204 | 0.0833   |
| P49189    | 4-trimethylaminobutyraldehyde dehydrogenase                                  | 0.000301 | 0.546954052  | 1.953407 | 0.081392 |
| Q02218    | 2-oxoglutarate dehydrogenase, mitochondrial                                  | 0.000826 | 0.544358496  | 1.944137 | 0.081006 |
| P28331    | NADH-ubiquinone oxidoreductase 75 kDa subunit, mitochondrial                 | 0.001021 | 0.53020038   | 1.893573 | 0.078899 |
| Q14324    | Myosin-binding protein C, fast-type                                          | 0.001912 | 0.5281869    | 1.886382 | 0.078599 |
| P56556    | NADH dehydrogenase [ubiquinone] 1 alpha subcomplex subunit 6                 | 0.000921 | 0.525462839  | 1.876653 | 0.078194 |
| P11310    | Medium-chain specific acyl-CoA dehydrogenase, mitochondrial                  | 0.000258 | 0.523265625  | 1.868806 | 0.077867 |
| Q8N142    | Adenylosuccinate synthetase isozyme 1                                        | 0.000821 | 0.522636951  | 1.866561 | 0.077773 |
| P63316    | Troponin C, slow skeletal and cardiac muscles                                | 0.005393 | 0.516299842  | 1.843928 | 0.07683  |
| P02511    | Alpha-crystallin B chain                                                     | 0.015264 | 0.515598832  | 1.841424 | 0.076726 |
| P18206    | Vinculin                                                                     | 0.000147 | 0.507648244  | 1.813029 | 0.075543 |
| Q04917    | 14-3-3 protein eta                                                           | 1.05E-05 | 0.505842639  | 1.806581 | 0.075274 |
| P19237    | Troponin I, slow skeletal muscle                                             | 6.74E-05 | 0.499045399  | 1.782305 | 0.074263 |
| P22314    | Ubiquitin-like modifier-activating enzyme 1                                  | 0.000606 | 0.496915688  | 1.774699 | 0.073946 |
| O75489    | NADH dehydrogenase [ubiquinone] iron-sulfur protein 3, mitochondrial         | 0.001024 | 0.491511697  | 1.755399 | 0.073142 |
| P55822    | SH3 domain-binding glutamic acid-rich protein                                | 0.000441 | 0.491135209  | 1.754054 | 0.073086 |
| Q13011    | Delta(3,5)-Delta(2,4)-dienoyl-CoA isomerase, mitochondrial                   | 0.001287 | 0.489060996  | 1.746646 | 0.072777 |
| Q16851    | UTP--glucose-1-phosphate uridylyltransferase                                 | 0.000105 | 0.487612909  | 1.741475 | 0.072561 |
| Q9GZV1    | Ankyrin repeat domain-containing protein 2                                   | 4.62E-05 | 0.487245533  | 1.740163 | 0.072507 |

|        |                                                                          |          |             |          |          |
|--------|--------------------------------------------------------------------------|----------|-------------|----------|----------|
| P23297 | Protein S100-A1                                                          | 0.000185 | 0.48711551  | 1.739698 | 0.072487 |
| O75891 | Cytosolic 10-formyltetrahydrofolate dehydrogenase                        | 5.32E-05 | 0.485486954 | 1.733882 | 0.072245 |
| P02585 | Troponin C, skeletal muscle                                              | 0.006642 | 0.484345265 | 1.729805 | 0.072075 |
| O60662 | Kelch repeat and BTB domain-containing protein 10                        | 1.37E-05 | 0.481899573 | 1.72107  | 0.071711 |
| Q14974 | Importin subunit beta-1                                                  | 0.000165 | 0.481763253 | 1.720583 | 0.071691 |
| P55084 | Trifunctional enzyme subunit beta, mitochondrial                         | 0.001762 | 0.481089441 | 1.718177 | 0.071591 |
| Q05639 | Elongation factor 1-alpha 2                                              | 8.53E-05 | 0.477670827 | 1.705967 | 0.071082 |
| O00757 | Fructose-1,6-bisphosphatase isozyme 2                                    | 0.001638 | 0.476564693 | 1.702017 | 0.070917 |
| P19367 | Hexokinase-1                                                             | 3.48E-05 | 0.474006155 | 1.692879 | 0.070537 |
| P31946 | 14-3-3 protein beta/alpha                                                | 0.00012  | 0.471346099 | 1.683379 | 0.070141 |
| P49748 | Very long-chain specific acyl-CoA dehydrogenase, mitochondrial           | 4.53E-06 | 0.470783329 | 1.681369 | 0.070057 |
| P13639 | Elongation factor 2                                                      | 0.00068  | 0.46782753  | 1.670813 | 0.069617 |
| Q96FJ2 | Dynein light chain 2, cytoplasmic                                        | 0.000475 | 0.460839009 | 1.645854 | 0.068577 |
| P54652 | Heat shock-related 70 kDa protein 2                                      | 0.000523 | 0.460613101 | 1.645047 | 0.068544 |
| P24310 | Cytochrome c oxidase subunit 7A1, mitochondrial                          | 0.000322 | 0.454239171 | 1.622283 | 0.067595 |
| Q16718 | NADH dehydrogenase [ubiquinone] 1 alpha subcomplex subunit 5             | 0.000124 | 0.452041675 | 1.614435 | 0.067268 |
| P45974 | Ubiquitin carboxyl-terminal hydrolase 5                                  | 5.44E-05 | 0.450973024 | 1.610618 | 0.067109 |
| Q07021 | Complement component 1 Q subcomponent-binding protein, mitochondrial     | 3.46E-05 | 0.44297992  | 1.582071 | 0.06592  |
| P11142 | Heat shock cognate 71 kDa protein                                        | 0.001393 | 0.441632821 | 1.57726  | 0.065719 |
| P13805 | Troponin T, slow skeletal muscle                                         | 0.000185 | 0.435505819 | 1.555378 | 0.064807 |
| P19404 | NADH dehydrogenase [ubiquinone] flavoprotein 2, mitochondrial            | 1.28E-05 | 0.434375431 | 1.551341 | 0.064639 |
| P13533 | Myosin-6                                                                 | 3.99E-06 | 0.433072474 | 1.546687 | 0.064445 |
| P04792 | Heat shock protein beta-1                                                | 0.007609 | 0.431450462 | 1.540895 | 0.064204 |
| P21817 | Ryanodine receptor 1                                                     | 1.73E-06 | 0.431340096 | 1.5405   | 0.064188 |
| P31040 | Succinate dehydrogenase [ubiquinone] flavoprotein subunit, mitochondrial | 0.000213 | 0.430007068 | 1.53574  | 0.063989 |
| P07237 | Protein disulfide-isomerase                                              | 0.000639 | 0.427923672 | 1.528299 | 0.063679 |
| P63104 | 14-3-3 protein zeta/delta                                                | 8.48E-05 | 0.426318684 | 1.522567 | 0.06344  |
| P12883 | Myosin-7                                                                 | 0.006745 | 0.425990041 | 1.521393 | 0.063391 |
| Q86VP6 | Cullin-associated NEDD8-dissociated protein 1                            | 5.83E-06 | 0.425156847 | 1.518417 | 0.063267 |
| O43707 | Alpha-actinin-4                                                          | 2.12E-05 | 0.423798788 | 1.513567 | 0.063065 |
| Q9UIJ7 | GTP:AMP phosphotransferase, mitochondrial                                | 0.000468 | 0.42354321  | 1.512654 | 0.063027 |
| Q9P2R7 | Succinyl-CoA ligase [ADP-forming] subunit beta, mitochondrial            | 3.23E-05 | 0.421861365 | 1.506648 | 0.062777 |
| Q8WW59 | SPRY domain-containing protein 4                                         | 1.54E-05 | 0.419689377 | 1.498891 | 0.062454 |
| P14927 | Cytochrome b-c1 complex subunit 7                                        | 6.97E-05 | 0.416199772 | 1.486428 | 0.061934 |
| Q9UHG3 | Prenylcysteine oxidase 1                                                 | 0.000131 | 0.415393662 | 1.483549 | 0.061815 |
| O75112 | LIM domain-binding protein 3                                             | 0.003028 | 0.407968929 | 1.457032 | 0.06071  |
| P10644 | cAMP-dependent protein kinase type I-alpha regulatory subunit            | 0.000352 | 0.406907085 | 1.45324  | 0.060552 |
| Q93100 | Phosphorylase b kinase regulatory subunit beta                           | 1.42E-05 | 0.406294345 | 1.451051 | 0.06046  |
| P04075 | Fructose-bisphosphate aldolase A                                         | 0.019452 | 0.404369615 | 1.444177 | 0.060174 |
| P62258 | 14-3-3 protein epsilon                                                   | 0.001686 | 0.402091721 | 1.436042 | 0.059835 |
| P07737 | Profilin-1                                                               | 0.001506 | 0.4015656   | 1.434163 | 0.059757 |
| Q9UKX2 | Myosin-2                                                                 | 0.006407 | 0.401249504 | 1.433034 | 0.05971  |
| P33121 | Long-chain-fatty-acid--CoA ligase 1                                      | 0.00086  | 0.400679725 | 1.430999 | 0.059625 |
| O14983 | Sarcoplasmic/endoplasmic reticulum calcium ATPase 1                      | 3.16E-05 | 0.399435873 | 1.426557 | 0.05944  |
| P51884 | Lumican                                                                  | 2.36E-05 | 0.398996427 | 1.424987 | 0.059374 |
| P25787 | Proteasome subunit alpha type-2                                          | 0.000135 | 0.397974747 | 1.421338 | 0.059222 |
| P14618 | Pyruvate kinase isozymes M1/M2                                           | 0.002177 | 0.397041945 | 1.418007 | 0.059084 |
| O43598 | Deoxyribonucleoside 5'-monophosphate N-glycosidase                       | 2.79E-05 | 0.395999741 | 1.414285 | 0.058929 |
| P08758 | Annexin A5                                                               | 0.001385 | 0.395346059 | 1.411195 | 0.058831 |
| Q9BXS1 | Isopentenyl-diphosphate Delta-isomerase 2                                | 0.000295 | 0.3953283   | 1.411887 | 0.058829 |
| Q9Y623 | Myosin-4                                                                 | 0.0002   | 0.393663816 | 1.405942 | 0.058581 |
| P48788 | Troponin I, fast skeletal muscle                                         | 0.000866 | 0.389831307 | 1.392255 | 0.058011 |
| P16615 | Sarcoplasmic/endoplasmic reticulum calcium ATPase 2                      | 0.002336 | 0.385793421 | 1.377834 | 0.05741  |
| P50461 | Cysteine and glycine-rich protein 3                                      | 0.000496 | 0.383665315 | 1.370233 | 0.057093 |
| P21399 | Cytoplasmic aconitate hydratase                                          | 0.000121 | 0.382420193 | 1.365786 | 0.056908 |
| Q9NSE4 | Isoleucine--tRNA ligase, mitochondrial                                   | 8.85E-05 | 0.381092317 | 1.361044 | 0.05671  |
| Q8TCA0 | Leucine-rich repeat-containing protein 20                                | 6.04E-05 | 0.380413711 | 1.35862  | 0.056609 |
| P14621 | Acylphosphatase-2                                                        | 0.000441 | 0.377954575 | 1.349838 | 0.056243 |
| Q06830 | Peroxiredoxin-1                                                          | 9.33E-05 | 0.37550443  | 1.341087 | 0.055879 |
| Q9NQC3 | Reticulon-4                                                              | 0.000833 | 0.373162545 | 1.332723 | 0.05553  |
| P10809 | 60 kDa heat shock protein, mitochondrial                                 | 0.000225 | 0.372293589 | 1.32962  | 0.055401 |
| O14880 | Microsomal glutathione S-transferase 3                                   | 0.000343 | 0.371429303 | 1.326533 | 0.055272 |
| P12235 | ADP/ATP translocase 1                                                    | 0.005261 | 0.370848388 | 1.324459 | 0.055186 |

|        |                                                                          |          |             |          |          |
|--------|--------------------------------------------------------------------------|----------|-------------|----------|----------|
| P17612 | cAMP-dependent protein kinase catalytic subunit alpha                    | 2.49E-05 | 0.370308582 | 1.322531 | 0.055105 |
| P21695 | Glycerol-3-phosphate dehydrogenase [NAD+], cytoplasmic                   | 0.000483 | 0.368109883 | 1.314678 | 0.054778 |
| Q13423 | NAD(P) transhydrogenase, mitochondrial                                   | 0.000375 | 0.366485757 | 1.308878 | 0.054537 |
| P25705 | ATP synthase subunit alpha, mitochondrial                                | 0.006524 | 0.365027485 | 1.30367  | 0.05432  |
| Q99798 | Aconitate hydratase, mitochondrial                                       | 0.000361 | 0.36460212  | 1.30215  | 0.054256 |
| P07954 | Fumarate hydratase, mitochondrial                                        | 0.00019  | 0.36408906  | 1.300318 | 0.05418  |
| P09669 | Cytochrome c oxidase subunit 6C                                          | 0.007212 | 0.363844102 | 1.299443 | 0.054143 |
| P17540 | Creatine kinase S-type, mitochondrial                                    | 0.003248 | 0.362626988 | 1.295096 | 0.053962 |
| P46020 | Phosphorylase b kinase regulatory subunit alpha, skeletal muscle isoform | 1.19E-05 | 0.361864134 | 1.292372 | 0.053849 |
| P12277 | Creatine kinase B-type                                                   | 0.000139 | 0.36043037  | 1.287251 | 0.053635 |
| P08133 | Annexin A6                                                               | 9.5E-05  | 0.357826608 | 1.277952 | 0.053248 |
| Q6ZMU5 | Tripartite motif-containing protein 72                                   | 0.001272 | 0.357698666 | 1.277495 | 0.053229 |
| P23528 | Cofilin-1                                                                | 0.000142 | 0.356912637 | 1.274688 | 0.053112 |
| P61970 | Nuclear transport factor 2                                               | 4.37E-05 | 0.356346596 | 1.272666 | 0.053028 |
| P30044 | Peroxiredoxin-5, mitochondrial                                           | 0.000254 | 0.355594782 | 1.269981 | 0.052916 |
| Q9Y281 | Cofilin-2                                                                | 4.25E-05 | 0.355095554 | 1.268198 | 0.052842 |
| P05976 | Myosin light chain 1/3, skeletal muscle isoform                          | 0.03886  | 0.354196568 | 1.264988 | 0.052708 |
| P30048 | Thioredoxin-dependent peroxide reductase, mitochondrial                  | 0.000578 | 0.352971409 | 1.260612 | 0.052526 |
| Q9UBQ7 | Glyoxylate reductase/hydroxypyruvate reductase                           | 0.000174 | 0.349744955 | 1.249089 | 0.052045 |
| P12882 | Myosin-1                                                                 | 0.002784 | 0.349322008 | 1.247579 | 0.051982 |
| P62937 | Peptidyl-prolyl cis-trans isomerase A                                    | 0.001757 | 0.348879948 | 1.246    | 0.051917 |
| Q14697 | Neutral alpha-glucosidase AB                                             | 5.13E-06 | 0.348496184 | 1.244629 | 0.05186  |
| P06576 | ATP synthase subunit beta, mitochondrial                                 | 0.007851 | 0.346640376 | 1.238001 | 0.051583 |
| Q9Y235 | Probable C->U-editing enzyme APOBEC-2                                    | 0.001476 | 0.345775774 | 1.234913 | 0.051455 |
| P13535 | Myosin-8                                                                 | 5.22E-05 | 0.34489908  | 1.231782 | 0.051324 |
| O43678 | NADH dehydrogenase [ubiquinone] 1 alpha subcomplex subunit 2             | 0.002439 | 0.344514476 | 1.230409 | 0.051267 |
| P47985 | Cytochrome b-c1 complex subunit Rieske, mitochondrial                    | 0.001243 | 0.344186517 | 1.229238 | 0.051218 |
| P00338 | L-lactate dehydrogenase A chain                                          | 0.006329 | 0.343761924 | 1.227721 | 0.051155 |
| Q9H7C9 | UPF0366 protein C11orf67                                                 | 0.001896 | 0.341786277 | 1.220665 | 0.050861 |
| P52179 | Myomesin-1                                                               | 4.12E-05 | 0.337731209 | 1.206183 | 0.050258 |
| P04040 | Catalase                                                                 | 0.000622 | 0.337066287 | 1.203808 | 0.050159 |
| P09622 | Dihydrolipoyl dehydrogenase, mitochondrial                               | 0.000566 | 0.336609221 | 1.202176 | 0.050091 |
| P00491 | Purine nucleoside phosphorylase                                          | 0.000164 | 0.335760558 | 1.199145 | 0.049964 |
| P50395 | Rab GDP dissociation inhibitor beta                                      | 0.000305 | 0.333877813 | 1.192421 | 0.049684 |
| P49821 | NADH dehydrogenase [ubiquinone] flavoprotein 1, mitochondrial            | 0.000113 | 0.332901777 | 1.188935 | 0.049539 |
| P13804 | Electron transfer flavoprotein subunit alpha, mitochondrial              | 0.000355 | 0.329496311 | 1.176773 | 0.049032 |
| Q16795 | NADH dehydrogenase [ubiquinone] 1 alpha subcomplex subunit 9, mitochondr | 0.000646 | 0.327073196 | 1.168119 | 0.048672 |
| Q9NZ45 | CDGSH iron-sulfur domain-containing protein 1                            | 0.001346 | 0.326703392 | 1.166798 | 0.048617 |
| P45378 | Troponin T, fast skeletal muscle                                         | 0.000772 | 0.326174324 | 1.164908 | 0.048538 |
| P13073 | Cytochrome c oxidase subunit 4 isoform 1, mitochondrial                  | 0.004809 | 0.325670087 | 1.163107 | 0.048463 |
| Q86TD4 | Sarcalumenin                                                             | 3.23E-05 | 0.323275208 | 1.154554 | 0.048106 |
| P17174 | Aspartate aminotransferase, cytoplasmic                                  | 0.002811 | 0.322069883 | 1.15025  | 0.047927 |
| P21796 | Voltage-dependent anion-selective channel protein 1                      | 0.005919 | 0.31869196  | 1.138186 | 0.047424 |
| P07195 | L-lactate dehydrogenase B chain                                          | 0.001267 | 0.31824627  | 1.136594 | 0.047358 |
| P00352 | Retinal dehydrogenase 1                                                  | 0.000251 | 0.318074295 | 1.13598  | 0.047332 |
| P09960 | Leukotriene A-4 hydrolase                                                | 4.17E-05 | 0.317492791 | 1.133903 | 0.047246 |
| O75298 | Reticulon-2                                                              | 5.83E-06 | 0.317435117 | 1.133697 | 0.047237 |
| P11217 | Glycogen phosphorylase, muscle form                                      | 0.015157 | 0.317068785 | 1.132389 | 0.047183 |
| P68371 | Tubulin beta-4B chain                                                    | 0.000461 | 0.316270379 | 1.129537 | 0.047064 |
| O75923 | Dysferlin                                                                | 3.69E-05 | 0.315306915 | 1.126096 | 0.046921 |
| P40925 | Malate dehydrogenase, cytoplasmic                                        | 0.003272 | 0.313347519 | 1.119098 | 0.046629 |
| P31930 | Cytochrome b-c1 complex subunit 1, mitochondrial                         | 0.000969 | 0.310168385 | 1.107744 | 0.046156 |
| P30084 | Enoyl-CoA hydratase, mitochondrial                                       | 0.000571 | 0.30917455  | 1.104195 | 0.046008 |
| P55290 | Cadherin-13                                                              | 0.000132 | 0.308229565 | 1.10082  | 0.045867 |
| P22695 | Cytochrome b-c1 complex subunit 2, mitochondrial                         | 0.00144  | 0.307744534 | 1.099088 | 0.045795 |
| P30041 | Peroxiredoxin-6                                                          | 0.004664 | 0.307718748 | 1.098996 | 0.045791 |
| Q9P0J0 | NADH dehydrogenase [ubiquinone] 1 alpha subcomplex subunit 13            | 0.000845 | 0.306383166 | 1.094226 | 0.045593 |
| P36542 | ATP synthase subunit gamma, mitochondrial                                | 0.00017  | 0.305384322 | 1.090658 | 0.045444 |
| P30043 | Flavin reductase (NADPH)                                                 | 0.000429 | 0.303506753 | 1.083953 | 0.045165 |
| P07437 | Tubulin beta chain                                                       | 0.000199 | 0.302972011 | 1.082043 | 0.045085 |
| Q00325 | Phosphate carrier protein, mitochondrial                                 | 2.08E-05 | 0.301238067 | 1.07585  | 0.044827 |
| P04406 | Glyceraldehyde-3-phosphate dehydrogenase                                 | 0.000882 | 0.300819791 | 1.074356 | 0.044765 |
| P30042 | ES1 protein homolog, mitochondrial                                       | 6.62E-05 | 0.299382214 | 1.069222 | 0.044551 |

|        |                                                                                                   |          |             |          |          |
|--------|---------------------------------------------------------------------------------------------------|----------|-------------|----------|----------|
| P35232 | Prohibitin                                                                                        | 0.000181 | 0.295775052 | 1.056339 | 0.044014 |
| P09382 | Galectin-1                                                                                        | 0.001627 | 0.295718354 | 1.056137 | 0.044006 |
| Q02978 | Mitochondrial 2-oxoglutarate/malate carrier protein                                               | 0.001489 | 0.293843835 | 1.049442 | 0.043727 |
| P00505 | Aspartate aminotransferase, mitochondrial                                                         | 0.002414 | 0.293818689 | 1.049352 | 0.043723 |
| P36871 | Phosphoglucomutase-1                                                                              | 0.000254 | 0.292946054 | 1.046236 | 0.043593 |
| O75390 | Citrate synthase, mitochondrial                                                                   | 0.000126 | 0.29197101  | 1.042754 | 0.043448 |
| P32119 | Peroxiredoxin-2                                                                                   | 0.000459 | 0.287392008 | 1.0264   | 0.042767 |
| P07951 | Tropomyosin beta chain                                                                            | 0.003893 | 0.285927245 | 1.021169 | 0.042549 |
| Q9NTK5 | Obg-like ATPase 1                                                                                 | 9.07E-05 | 0.284742546 | 1.016938 | 0.042372 |
| Q16836 | Hydroxyacyl-coenzyme A dehydrogenase, mitochondrial                                               | 3.44E-05 | 0.284551601 | 1.016256 | 0.042344 |
| P56385 | ATP synthase subunit e, mitochondrial                                                             | 0.003636 | 0.283820961 | 1.013646 | 0.042235 |
| O43920 | NADH dehydrogenase [ubiquinone] iron-sulfur protein 5                                             | 0.000532 | 0.283115616 | 1.011127 | 0.04213  |
| P00915 | Carbonic anhydrase 1                                                                              | 0.005296 | 0.282992515 | 1.010688 | 0.042112 |
| P06753 | Tropomyosin alpha-3 chain                                                                         | 0.00165  | 0.282241746 | 1.008006 | 0.042    |
| P04179 | Superoxide dismutase [Mn], mitochondrial                                                          | 0.002811 | 0.282011644 | 1.007184 | 0.041966 |
| O14949 | Cytochrome b-c1 complex subunit 8                                                                 | 0.002141 | 0.280684496 | 1.002445 | 0.041769 |
| P09211 | Glutathione S-transferase P                                                                       | 8.59E-05 | 0.280520831 | 1.00186  | 0.041744 |
| P40926 | Malate dehydrogenase, mitochondrial                                                               | 0.005236 | 0.279662733 | 0.998795 | 0.041616 |
| P09493 | Tropomyosin alpha-1 chain                                                                         | 0.000153 | 0.278958091 | 0.996279 | 0.041512 |
| P24752 | Acetyl-CoA acetyltransferase, mitochondrial                                                       | 0.001725 | 0.278415869 | 0.994342 | 0.041431 |
| Q86Y39 | NADH dehydrogenase [ubiquinone] 1 alpha subcomplex subunit 11                                     | 5.91E-05 | 0.275273649 | 0.98312  | 0.040963 |
| P48047 | ATP synthase subunit O, mitochondrial                                                             | 0.002641 | 0.273948634 | 0.978388 | 0.040766 |
| P20674 | Cytochrome c oxidase subunit 5A, mitochondrial                                                    | 0.001281 | 0.273833182 | 0.977976 | 0.040749 |
| P09972 | Fructose-bisphosphate aldolase C                                                                  | 0.000106 | 0.273344692 | 0.976231 | 0.040676 |
| P30038 | Delta-1-pyrroline-5-carboxylate dehydrogenase, mitochondrial                                      | 3.84E-05 | 0.272641993 | 0.973721 | 0.040572 |
| O75208 | Ubiquinone biosynthesis protein COQ9, mitochondrial                                               | 7.58E-05 | 0.271739694 | 0.970499 | 0.040437 |
| Q16698 | 2,4-dienoyl-CoA reductase, mitochondrial                                                          | 0.000754 | 0.270982015 | 0.967793 | 0.040325 |
| P10916 | Myosin regulatory light chain 2, ventricular/cardiac muscle isoform                               | 0.038096 | 0.270485674 | 0.96602  | 0.040251 |
| P10606 | Cytochrome c oxidase subunit 5B, mitochondrial                                                    | 0.00115  | 0.269001581 | 0.96072  | 0.04003  |
| P00403 | Cytochrome c oxidase subunit 2                                                                    | 0.00224  | 0.268012467 | 0.957187 | 0.039883 |
| P48163 | NADP-dependent malic enzyme                                                                       | 5.58E-05 | 0.267765169 | 0.956304 | 0.039846 |
| P30711 | Glutathione S-transferase theta-1                                                                 | 0.000223 | 0.267510002 | 0.955393 | 0.039808 |
| Q9Y2J8 | Protein-arginine deiminase type-2                                                                 | 0.000659 | 0.265965813 | 0.949878 | 0.039578 |
| P00441 | Superoxide dismutase [Cu-Zn]                                                                      | 2.06E-05 | 0.265763186 | 0.949154 | 0.039548 |
| P48735 | Isocitrate dehydrogenase [NADP], mitochondrial                                                    | 0.004663 | 0.26501552  | 0.946484 | 0.039437 |
| Q96AB3 | Isochorismatase domain-containing protein 2, mitochondrial                                        | 8.63E-05 | 0.264893074 | 0.946047 | 0.039419 |
| Q16891 | Mitochondrial inner membrane protein                                                              | 2.45E-05 | 0.264063013 | 0.943082 | 0.039295 |
| P18669 | Phosphoglycerate mutase 1                                                                         | 3.56E-05 | 0.262790444 | 0.938537 | 0.039106 |
| P13929 | Beta-enolase                                                                                      | 0.011247 | 0.261111116 | 0.93254  | 0.038856 |
| P56134 | ATP synthase subunit f, mitochondrial                                                             | 0.002387 | 0.258672448 | 0.92383  | 0.038493 |
| O75323 | Protein NipSnap homolog 2                                                                         | 0.001161 | 0.257959523 | 0.921284 | 0.038387 |
| Q9Y6M9 | NADH dehydrogenase [ubiquinone] 1 beta subcomplex subunit 9                                       | 0.000113 | 0.257383986 | 0.919229 | 0.038301 |
| O75947 | ATP synthase subunit d, mitochondrial                                                             | 0.002244 | 0.257374852 | 0.919196 | 0.0383   |
| P06744 | Glucose-6-phosphate isomerase                                                                     | 0.00273  | 0.255324899 | 0.911875 | 0.037995 |
| O43676 | NADH dehydrogenase [ubiquinone] 1 beta subcomplex subunit 3                                       | 0.000697 | 0.255320278 | 0.911858 | 0.037994 |
| P11177 | Pyruvate dehydrogenase E1 component subunit beta, mitochondrial                                   | 9.87E-05 | 0.254716015 | 0.9097   | 0.037904 |
| O95831 | Apoptosis-inducing factor 1, mitochondrial                                                        | 0.000127 | 0.254173999 | 0.907764 | 0.037824 |
| P08559 | Pyruvate dehydrogenase E1 component subunit alpha, somatic form, mitochondrion                    | 0.000419 | 0.253187959 | 0.904243 | 0.037677 |
| P31939 | Bifunctional purine biosynthesis protein PURH                                                     | 7.46E-05 | 0.252761516 | 0.90272  | 0.037613 |
| P15259 | Phosphoglycerate mutase 2                                                                         | 0.002563 | 0.252453425 | 0.901619 | 0.037567 |
| P42765 | 3-ketoacyl-CoA thiolase, mitochondrial                                                            | 0.00017  | 0.251654102 | 0.898765 | 0.037449 |
| P05413 | Fatty acid-binding protein, heart                                                                 | 0.010982 | 0.248831901 | 0.888685 | 0.037029 |
| P24539 | ATP synthase subunit b, mitochondrial                                                             | 0.000221 | 0.246663984 | 0.880943 | 0.036706 |
| P36957 | Dihydrolypoyllysine-residue succinyltransferase component of 2-oxoglutarate dehydrogenase complex | 0.000829 | 0.246273572 | 0.879548 | 0.036648 |
| Q99497 | Protein DJ-1                                                                                      | 0.002136 | 0.244007589 | 0.871456 | 0.036311 |
| P30086 | Phosphatidylethanolamine-binding protein 1                                                        | 0.005145 | 0.242823677 | 0.867227 | 0.036134 |
| Q96A32 | Myosin regulatory light chain 2, skeletal muscle isoform                                          | 0.04528  | 0.239083575 | 0.85387  | 0.035578 |
| P00558 | Phosphoglycerate kinase 1                                                                         | 0.004829 | 0.238453395 | 0.851619 | 0.035484 |
| P08574 | Cytochrome c1, heme protein, mitochondrial                                                        | 0.001133 | 0.237251179 | 0.847326 | 0.035305 |
| P10599 | Thioredoxin                                                                                       | 3.32E-05 | 0.237155631 | 0.846984 | 0.035291 |
| P21266 | Glutathione S-transferase Mu 3                                                                    | 9.6E-05  | 0.236837869 | 0.84585  | 0.035244 |
| P60174 | Triosephosphate isomerase                                                                         | 0.000164 | 0.236595403 | 0.844984 | 0.035208 |
| P06732 | Creatine kinase M-type                                                                            | 0.041364 | 0.23651695  | 0.844703 | 0.035196 |

|        |                                                              |          |             |          |          |
|--------|--------------------------------------------------------------|----------|-------------|----------|----------|
| O95168 | NADH dehydrogenase [ubiquinone] 1 beta subcomplex subunit 4  | 0.000333 | 0.231713853 | 0.827549 | 0.034481 |
| P40939 | Trifunctional enzyme subunit alpha, mitochondrial            | 0.002453 | 0.230528244 | 0.823315 | 0.034305 |
| P02549 | Spectrin alpha chain, erythrocyte                            | 1.28E-05 | 0.22937254  | 0.819188 | 0.034133 |
| P20618 | Proteasome subunit beta type-1                               | 0.000161 | 0.227843754 | 0.813728 | 0.033905 |
| P61088 | Ubiquitin-conjugating enzyme E2 N                            | 0.000638 | 0.22638902  | 0.808532 | 0.033689 |
| P99999 | Cytochrome c                                                 | 0.008992 | 0.22536231  | 0.804865 | 0.033536 |
| O75431 | Metaxin-2                                                    | 3.65E-05 | 0.225241115 | 0.804433 | 0.033518 |
| P35609 | Alpha-actinin-2                                              | 0.001821 | 0.223502724 | 0.798224 | 0.033259 |
| P28161 | Glutathione S-transferase Mu 2                               | 7.29E-05 | 0.219095041 | 0.782482 | 0.032603 |
| P06733 | Alpha-enolase                                                | 0.001659 | 0.214996609 | 0.767845 | 0.031994 |
| O75083 | WD repeat-containing protein 1                               | 1.91E-05 | 0.214475413 | 0.765984 | 0.031916 |
| P10768 | S-formylglutathione hydrolase                                | 5.47E-05 | 0.212044068 | 0.7573   | 0.031554 |
| Q99623 | Prohibitin-2                                                 | 0.001266 | 0.211042329 | 0.753723 | 0.031405 |
| P35270 | Sepiapterin reductase                                        | 0.00012  | 0.210718811 | 0.752567 | 0.031357 |
| O96000 | NADH dehydrogenase [ubiquinone] 1 beta subcomplex subunit 10 | 0.00014  | 0.207993393 | 0.742834 | 0.030951 |
| O75964 | ATP synthase subunit g, mitochondrial                        | 0.012495 | 0.205295072 | 0.733197 | 0.03055  |
| P78417 | Glutathione S-transferase omega-1                            | 7.98E-05 | 0.203343331 | 0.726226 | 0.030259 |
| P15121 | Aldose reductase                                             | 0.001722 | 0.201633418 | 0.720119 | 0.030005 |
| Q9NRX4 | 14 kDa phosphohistidine phosphatase                          | 0.001036 | 0.201212213 | 0.718615 | 0.029942 |
| P00918 | Carbonic anhydrase 2                                         | 0.002088 | 0.199203812 | 0.711442 | 0.029643 |
| Q08043 | Alpha-actinin-3                                              | 0.0001   | 0.193089542 | 0.689606 | 0.028734 |
| P00568 | Adenylate kinase isoenzyme 1                                 | 0.00068  | 0.18188171  | 0.649578 | 0.027066 |
| P04080 | Cystatin-B                                                   | 0.000117 | 0.181713523 | 0.648977 | 0.027041 |
| P49773 | Histidine triad nucleotide-binding protein 1                 | 0.000765 | 0.180720225 | 0.645429 | 0.026893 |
| P07451 | Carbonic anhydrase 3                                         | 0.019892 | 0.176451414 | 0.630184 | 0.026258 |
| P51649 | Succinate-semialdehyde dehydrogenase, mitochondrial          | 0.000101 | 0.173987854 | 0.621385 | 0.025891 |
| P09417 | Dihydropteridine reductase                                   | 0.000691 | 0.172087348 | 0.614598 | 0.025608 |
| P07108 | Acyl-CoA-binding protein                                     | 0.0004   | 0.171224319 | 0.611515 | 0.02548  |
| P68133 | Actin, alpha skeletal muscle                                 | 0.003644 | 0.15990865  | 0.571102 | 0.023796 |
| P52758 | Ribonuclease UK114                                           | 4.05E-05 | 0.153202    | 0.54715  | 0.022798 |
| P08590 | Myosin light chain 3                                         | 0.020542 | 0.14508483  | 0.51816  | 0.02159  |
| P02144 | Myoglobin                                                    | 0.119887 | 0.136888052 | 0.488886 | 0.02037  |
| P35754 | Glutaredoxin-1                                               | 0.001699 | 0.134434843 | 0.480124 | 0.020005 |
| Q5VXT5 | Synaptophysin-like protein 2                                 | 2.8E-05  | 0.086872245 | 0.310258 | 0.012927 |
| P12829 | Myosin light chain 4                                         | 8.6E-05  | 0.074446184 | 0.265879 | 0.011078 |

Sum 0.706036

**Sorted by Content (high to low)**

| Accession | protein                                                             | CONTENT  | Fraction New | (%/day)  | (%/hr)   |
|-----------|---------------------------------------------------------------------|----------|--------------|----------|----------|
| P02144    | Myoglobin                                                           | 0.119887 | 0.136888052  | 0.488886 | 0.02037  |
| Q96A32    | Myosin regulatory light chain 2, skeletal muscle isoform            | 0.04528  | 0.239083575  | 0.85387  | 0.035578 |
| P06732    | Creatine kinase M-type                                              | 0.041364 | 0.23651695   | 0.844703 | 0.035196 |
| P05976    | Myosin light chain 1/3, skeletal muscle isoform                     | 0.03886  | 0.354196568  | 1.264988 | 0.052708 |
| P10916    | Myosin regulatory light chain 2, ventricular/cardiac muscle isoform | 0.038096 | 0.270485674  | 0.96602  | 0.040251 |
| P08590    | Myosin light chain 3                                                | 0.020542 | 0.14508483   | 0.51816  | 0.02159  |
| P07451    | Carbonic anhydrase 3                                                | 0.019892 | 0.176451414  | 0.630184 | 0.026258 |
| P04075    | Fructose-bisphosphate aldolase A                                    | 0.019452 | 0.404369615  | 1.444177 | 0.060174 |
| P02511    | Alpha-crystallin B chain                                            | 0.015264 | 0.515598832  | 1.841424 | 0.076726 |
| P11217    | Glycogen phosphorylase, muscle form                                 | 0.015157 | 0.317068785  | 1.132389 | 0.047183 |
| P02768    | Serum albumin                                                       | 0.01313  | 0.566289229  | 2.022462 | 0.084269 |
| P075964   | ATP synthase subunit g, mitochondrial                               | 0.012495 | 0.205295072  | 0.733197 | 0.03055  |
| P13929    | Beta-enolase                                                        | 0.011247 | 0.261111116  | 0.93254  | 0.038856 |
| P05413    | Fatty acid-binding protein, heart                                   | 0.010982 | 0.248831901  | 0.888685 | 0.037029 |
| P99999    | Cytochrome c                                                        | 0.008992 | 0.22536231   | 0.804865 | 0.033536 |
| P06576    | ATP synthase subunit beta, mitochondrial                            | 0.007851 | 0.346640376  | 1.238001 | 0.051583 |
| P04792    | Heat shock protein beta-1                                           | 0.007609 | 0.431450462  | 1.540895 | 0.064204 |
| P09669    | Cytochrome c oxidase subunit 6C                                     | 0.007212 | 0.363844102  | 1.299443 | 0.054143 |
| P12883    | Myosin-7                                                            | 0.006745 | 0.425990041  | 1.521393 | 0.063391 |
| P02585    | Troponin C, skeletal muscle                                         | 0.006642 | 0.484345265  | 1.729805 | 0.072075 |
| P25705    | ATP synthase subunit alpha, mitochondrial                           | 0.006524 | 0.365027485  | 1.30367  | 0.05432  |
| Q9UKX2    | Myosin-2                                                            | 0.006407 | 0.401249504  | 1.433034 | 0.05971  |
| P00338    | L-lactate dehydrogenase A chain                                     | 0.006329 | 0.343761924  | 1.227721 | 0.051155 |
| P21796    | Voltage-dependent anion-selective channel protein 1                 | 0.005919 | 0.31869196   | 1.138186 | 0.047424 |
| O00483    | NADH dehydrogenase [ubiquinone] 1 alpha subcomplex subunit 4        | 0.005413 | 0.620566608  | 2.216309 | 0.092346 |
| P63316    | Troponin C, slow skeletal and cardiac muscles                       | 0.005393 | 0.516299842  | 1.843928 | 0.07683  |
| P00915    | Carbonic anhydrase 1                                                | 0.005296 | 0.282992515  | 1.010688 | 0.042112 |
| P12235    | ADP/ATP translocase 1                                               | 0.005261 | 0.370848388  | 1.324459 | 0.055186 |
| P40926    | Malate dehydrogenase, mitochondrial                                 | 0.005236 | 0.279662733  | 0.998795 | 0.041616 |
| P30086    | Phosphatidylethanolamine-binding protein 1                          | 0.005145 | 0.242823677  | 0.867227 | 0.036134 |
| P00558    | Phosphoglycerate kinase 1                                           | 0.004829 | 0.238453395  | 0.851619 | 0.035484 |
| P13073    | Cytochrome c oxidase subunit 4 isoform 1, mitochondrial             | 0.004809 | 0.325670087  | 1.163107 | 0.048463 |
| P30041    | Peroxiredoxin-6                                                     | 0.004664 | 0.307718748  | 1.098996 | 0.045791 |
| P48735    | Isocitrate dehydrogenase [NADP], mitochondrial                      | 0.004663 | 0.26501552   | 0.946484 | 0.039437 |
| O14558    | Heat shock protein beta-6                                           | 0.003936 | 0.605462649  | 2.162367 | 0.090099 |
| P07951    | Tropomyosin beta chain                                              | 0.003893 | 0.285927245  | 1.021169 | 0.042549 |
| P68133    | Actin, alpha skeletal muscle                                        | 0.003644 | 0.15990865   | 0.571102 | 0.023796 |
| P56385    | ATP synthase subunit e, mitochondrial                               | 0.003636 | 0.283820961  | 1.013646 | 0.042235 |
| P40925    | Malate dehydrogenase, cytoplasmic                                   | 0.003272 | 0.313347519  | 1.119098 | 0.046629 |
| P17540    | Creatine kinase S-type, mitochondrial                               | 0.003248 | 0.362626988  | 1.295096 | 0.053962 |
| O75112    | LIM domain-binding protein 3                                        | 0.003028 | 0.407968929  | 1.457032 | 0.06071  |
| P04179    | Superoxide dismutase [Mn], mitochondrial                            | 0.002811 | 0.282011644  | 1.007184 | 0.041966 |
| P17174    | Aspartate aminotransferase, cytoplasmic                             | 0.002811 | 0.322069883  | 1.15025  | 0.047927 |
| P12882    | Myosin-1                                                            | 0.002784 | 0.349322008  | 1.247579 | 0.051982 |
| P06744    | Glucose-6-phosphate isomerase                                       | 0.00273  | 0.255324899  | 0.911875 | 0.037995 |
| P48047    | ATP synthase subunit O, mitochondrial                               | 0.002641 | 0.273948634  | 0.978388 | 0.040766 |
| P15259    | Phosphoglycerate mutase 2                                           | 0.002563 | 0.252453425  | 0.901619 | 0.037567 |
| P40939    | Trifunctional enzyme subunit alpha, mitochondrial                   | 0.002453 | 0.230528244  | 0.823315 | 0.034305 |
| O43678    | NADH dehydrogenase [ubiquinone] 1 alpha subcomplex subunit 2        | 0.002439 | 0.344514476  | 1.230409 | 0.051267 |
| P00505    | Aspartate aminotransferase, mitochondrial                           | 0.002414 | 0.293818689  | 1.049352 | 0.043723 |
| P56134    | ATP synthase subunit f, mitochondrial                               | 0.002387 | 0.258672448  | 0.92383  | 0.038493 |
| P16615    | Sarcoplasmic/endoplasmic reticulum calcium ATPase 2                 | 0.002336 | 0.385793421  | 1.377834 | 0.05741  |
| O75947    | ATP synthase subunit d, mitochondrial                               | 0.002244 | 0.257374852  | 0.919196 | 0.0383   |
| P00403    | Cytochrome c oxidase subunit 2                                      | 0.00224  | 0.268012467  | 0.957187 | 0.039883 |
| P14618    | Pyruvate kinase isozymes M1/M2                                      | 0.002177 | 0.397041945  | 1.418007 | 0.059084 |
| O14949    | Cytochrome b-c1 complex subunit 8                                   | 0.002141 | 0.280684496  | 1.002445 | 0.041769 |
| Q99497    | Protein DJ-1                                                        | 0.002136 | 0.244007589  | 0.871456 | 0.036311 |
| Q53GG5    | PDZ and LIM domain protein 3                                        | 0.002118 | 0.559777104  | 1.999204 | 0.0833   |
| P02647    | Apolipoprotein A-I                                                  | 0.002102 | 1.043772325  | 3.727758 | 0.155323 |
| P00918    | Carbonic anhydrase 2                                                | 0.002088 | 0.199203812  | 0.711442 | 0.029643 |
| Q14324    | Myosin-binding protein C, fast-type                                 | 0.001912 | 0.5281869    | 1.886382 | 0.078599 |

|        |                                                                             |          |             |          |          |
|--------|-----------------------------------------------------------------------------|----------|-------------|----------|----------|
| Q9H7C9 | UPF0366 protein C11orf67                                                    | 0.001896 | 0.341786277 | 1.220665 | 0.050861 |
| P02794 | Ferritin heavy chain                                                        | 0.001862 | 0.617861772 | 2.206649 | 0.091944 |
| P35609 | Alpha-actinin-2                                                             | 0.001821 | 0.223502724 | 0.798224 | 0.033259 |
| P55084 | Trifunctional enzyme subunit beta, mitochondrial                            | 0.001762 | 0.481089441 | 1.718177 | 0.071591 |
| P62937 | Peptidyl-prolyl cis-trans isomerase A                                       | 0.001757 | 0.348879948 | 1.246    | 0.051917 |
| P24752 | Acetyl-CoA acetyltransferase, mitochondrial                                 | 0.001725 | 0.278415869 | 0.994342 | 0.041431 |
| P15121 | Aldose reductase                                                            | 0.001722 | 0.201633418 | 0.720119 | 0.030005 |
| P35754 | Glutaredoxin-1                                                              | 0.001699 | 0.134434843 | 0.480124 | 0.020005 |
| P62258 | 14-3-3 protein epsilon                                                      | 0.001686 | 0.402091721 | 1.436042 | 0.059835 |
| P06733 | Alpha-enolase                                                               | 0.001659 | 0.214996609 | 0.767845 | 0.031994 |
| P06753 | Tropomyosin alpha-3 chain                                                   | 0.00165  | 0.282241746 | 1.008006 | 0.042    |
| O00757 | Fructose-1,6-bisphosphatase isozyme 2                                       | 0.001638 | 0.476564693 | 1.702017 | 0.070917 |
| P09382 | Galectin-1                                                                  | 0.001627 | 0.295718354 | 1.056137 | 0.044006 |
| P07737 | Profilin-1                                                                  | 0.001506 | 0.4015656   | 1.434163 | 0.059757 |
| Q02978 | Mitochondrial 2-oxoglutarate/malate carrier protein                         | 0.001489 | 0.293843835 | 1.049442 | 0.043727 |
| Q9Y235 | Probable C->U-editing enzyme APOBEC-2                                       | 0.001476 | 0.345775774 | 1.234913 | 0.051455 |
| P22695 | Cytochrome b-c1 complex subunit 2, mitochondrial                            | 0.00144  | 0.307744534 | 1.099088 | 0.045795 |
| P11142 | Heat shock cognate 71 kDa protein                                           | 0.001393 | 0.441632821 | 1.57726  | 0.065719 |
| P08758 | Annexin A5                                                                  | 0.001385 | 0.395346059 | 1.41195  | 0.058831 |
| Q9NZ45 | CDGSH iron-sulfur domain-containing protein 1                               | 0.001346 | 0.326703392 | 1.166798 | 0.048617 |
| Q13011 | Delta(3,5)-Delta(2,4)-dienoyl-CoA isomerase, mitochondrial                  | 0.001287 | 0.489060996 | 1.746646 | 0.072777 |
| P20674 | Cytochrome c oxidase subunit 5A, mitochondrial                              | 0.001281 | 0.273833182 | 0.977976 | 0.040749 |
| Q6ZMU5 | Tripartite motif-containing protein 72                                      | 0.001272 | 0.357698666 | 1.277495 | 0.053229 |
| P07195 | L-lactate dehydrogenase B chain                                             | 0.001267 | 0.31824627  | 1.136594 | 0.047358 |
| Q99623 | Prohibitin-2                                                                | 0.001266 | 0.211042329 | 0.753723 | 0.031405 |
| P47985 | Cytochrome b-c1 complex subunit Rieske, mitochondrial                       | 0.001243 | 0.344186517 | 1.229238 | 0.051218 |
| O75323 | Protein NipSnap homolog 2                                                   | 0.001161 | 0.257959523 | 0.921284 | 0.038387 |
| P10606 | Cytochrome c oxidase subunit 5B, mitochondrial                              | 0.00115  | 0.269001581 | 0.96072  | 0.04003  |
| P08574 | Cytochrome c1, heme protein, mitochondrial                                  | 0.001133 | 0.237251179 | 0.847326 | 0.035305 |
| P61981 | 14-3-3 protein gamma                                                        | 0.001078 | 0.581726428 | 2.077594 | 0.086566 |
| P01009 | Alpha-1-antitrypsin                                                         | 0.001076 | 0.739732891 | 2.641903 | 0.110079 |
| Q9NRX4 | 14 kDa phosphohistidine phosphatase                                         | 0.001036 | 0.201212213 | 0.718615 | 0.029942 |
| O75489 | NADH dehydrogenase [ubiquinone] iron-sulfur protein 3, mitochondrial        | 0.001024 | 0.491511697 | 1.755399 | 0.073142 |
| P28331 | NADH-ubiquinone oxidoreductase 75 kDa subunit, mitochondrial                | 0.001021 | 0.53020038  | 1.893573 | 0.078899 |
| P31930 | Cytochrome b-c1 complex subunit 1, mitochondrial                            | 0.000969 | 0.310168385 | 1.107744 | 0.046156 |
| P56556 | NADH dehydrogenase [ubiquinone] 1 alpha subcomplex subunit 6                | 0.000921 | 0.525462839 | 1.876653 | 0.078194 |
| P04406 | Glyceraldehyde-3-phosphate dehydrogenase                                    | 0.000882 | 0.300819791 | 1.074356 | 0.044765 |
| P48788 | Troponin I, fast skeletal muscle                                            | 0.000866 | 0.389831307 | 1.392255 | 0.058011 |
| P33121 | Long-chain-fatty-acid--CoA ligase 1                                         | 0.00086  | 0.400679725 | 1.430999 | 0.059625 |
| Q9P0J0 | NADH dehydrogenase [ubiquinone] 1 alpha subcomplex subunit 13               | 0.000845 | 0.306383166 | 1.094226 | 0.045593 |
| Q9NQC3 | Reticulon-4                                                                 | 0.000833 | 0.373162545 | 1.332723 | 0.05553  |
| P36957 | Dihydrolipoyllysine-residue succinyltransferase component of 2-oxoglutarate | 0.000829 | 0.246273572 | 0.879548 | 0.036648 |
| Q02218 | 2-oxoglutarate dehydrogenase, mitochondrial                                 | 0.000826 | 0.544358496 | 1.944137 | 0.081006 |
| Q8N142 | Adenylosuccinate synthetase isozyme 1                                       | 0.000821 | 0.522636951 | 1.866561 | 0.077773 |
| P45378 | Troponin T, fast skeletal muscle                                            | 0.000772 | 0.326174324 | 1.164908 | 0.048538 |
| P49773 | Histidine triad nucleotide-binding protein 1                                | 0.000765 | 0.180720225 | 0.645429 | 0.026893 |
| Q16698 | 2,4-dienoyl-CoA reductase, mitochondrial                                    | 0.000754 | 0.270982015 | 0.967793 | 0.040325 |
| O43676 | NADH dehydrogenase [ubiquinone] 1 beta subcomplex subunit 3                 | 0.000697 | 0.255320278 | 0.911858 | 0.037994 |
| P09417 | Dihydropteridine reductase                                                  | 0.000691 | 0.172087348 | 0.614598 | 0.025608 |
| P13639 | Elongation factor 2                                                         | 0.00068  | 0.46782753  | 1.670813 | 0.069617 |
| P00568 | Adenylate kinase isoenzyme 1                                                | 0.00068  | 0.18188171  | 0.649578 | 0.027066 |
| Q9Y2J8 | Protein-arginine deiminase type-2                                           | 0.000659 | 0.265965813 | 0.949878 | 0.039578 |
| Q16795 | NADH dehydrogenase [ubiquinone] 1 alpha subcomplex subunit 9, mitochondr    | 0.000646 | 0.327073196 | 1.168119 | 0.048672 |
| P07237 | Protein disulfide-isomerase                                                 | 0.000639 | 0.427923672 | 1.528299 | 0.063679 |
| P61088 | Ubiquitin-conjugating enzyme E2 N                                           | 0.000638 | 0.22638902  | 0.808532 | 0.033689 |
| P04040 | Catalase                                                                    | 0.000622 | 0.337066287 | 1.203808 | 0.050159 |
| P22314 | Ubiquitin-like modifier-activating enzyme 1                                 | 0.000606 | 0.496915688 | 1.774699 | 0.073946 |
| P30048 | Thioredoxin-dependent peroxide reductase, mitochondrial                     | 0.000578 | 0.352971409 | 1.260612 | 0.052526 |
| P30084 | Enoyl-CoA hydratase, mitochondrial                                          | 0.000571 | 0.30917455  | 1.104195 | 0.046008 |
| P09622 | Dihydrolipoyl dehydrogenase, mitochondrial                                  | 0.000566 | 0.336609221 | 1.202176 | 0.050091 |
| O43920 | NADH dehydrogenase [ubiquinone] iron-sulfur protein 5                       | 0.000532 | 0.283115616 | 1.011127 | 0.04213  |
| P54652 | Heat shock-related 70 kDa protein 2                                         | 0.000523 | 0.460613101 | 1.645047 | 0.068544 |
| P50461 | Cysteine and glycine-rich protein 3                                         | 0.000496 | 0.383665315 | 1.370233 | 0.057093 |

|        |                                                                          |          |             |          |          |
|--------|--------------------------------------------------------------------------|----------|-------------|----------|----------|
| P15090 | Fatty acid-binding protein, adipocyte                                    | 0.000483 | 0.625187974 | 2.232814 | 0.093034 |
| P21695 | Glycerol-3-phosphate dehydrogenase [NAD+], cytoplasmic                   | 0.000483 | 0.368109883 | 1.314678 | 0.054778 |
| Q96FJ2 | Dynein light chain 2, cytoplasmic                                        | 0.000475 | 0.460839009 | 1.645854 | 0.068577 |
| Q9UIJ7 | GTP:AMP phosphotransferase, mitochondrial                                | 0.000468 | 0.42354321  | 1.512654 | 0.063027 |
| P68371 | Tubulin beta-4B chain                                                    | 0.000461 | 0.316270379 | 1.129537 | 0.047064 |
| P32119 | Peroxiredoxin-2                                                          | 0.000459 | 0.287392008 | 1.0264   | 0.042767 |
| P55822 | SH3 domain-binding glutamic acid-rich protein                            | 0.000441 | 0.491135209 | 1.754054 | 0.073086 |
| P14621 | Acylphosphatase-2                                                        | 0.000441 | 0.377954575 | 1.349838 | 0.056243 |
| P30043 | Flavin reductase (NADPH)                                                 | 0.000429 | 0.303506753 | 1.083953 | 0.045165 |
| P08559 | Pyruvate dehydrogenase E1 component subunit alpha, somatic form, mito    | 0.000419 | 0.253187959 | 0.904243 | 0.037677 |
| P07108 | Acyl-CoA-binding protein                                                 | 0.0004   | 0.171224319 | 0.611515 | 0.02548  |
| P17661 | Desmin                                                                   | 0.000398 | 0.619010314 | 2.210751 | 0.092115 |
| P30153 | Serine/threonine-protein phosphatase 2A 65 kDa regulatory subunit A alph | 0.000395 | 0.612261843 | 2.186649 | 0.09111  |
| Q13423 | NAD(P) transhydrogenase, mitochondrial                                   | 0.000375 | 0.366485757 | 1.308878 | 0.054537 |
| Q99798 | Aconitate hydratase, mitochondrial                                       | 0.000361 | 0.36460212  | 1.30215  | 0.054256 |
| P13804 | Electron transfer flavoprotein subunit alpha, mitochondrial              | 0.000355 | 0.329496311 | 1.176773 | 0.049032 |
| P10644 | cAMP-dependent protein kinase type I-alpha regulatory subunit            | 0.000352 | 0.406907085 | 1.45324  | 0.060552 |
| P02787 | Serotransferrin                                                          | 0.000346 | 0.740949286 | 2.646247 | 0.11026  |
| O14880 | Microsomal glutathione S-transferase 3                                   | 0.000343 | 0.371429303 | 1.326533 | 0.055272 |
| O95168 | NADH dehydrogenase [ubiquinone] 1 beta subcomplex subunit 4              | 0.000333 | 0.231713853 | 0.827549 | 0.034481 |
| P24310 | Cytochrome c oxidase subunit 7A1, mitochondrial                          | 0.000322 | 0.454239171 | 1.622283 | 0.067595 |
| P50395 | Rab GDP dissociation inhibitor beta                                      | 0.000305 | 0.333877813 | 1.192421 | 0.049684 |
| P49189 | 4-trimethylaminobutyraldehyde dehydrogenase                              | 0.000301 | 0.546954052 | 1.953407 | 0.081392 |
| Q9BXS1 | Isopentenyl-diphosphate Delta-isomerase 2                                | 0.000295 | 0.3953283   | 1.411887 | 0.058829 |
| P11310 | Medium-chain specific acyl-CoA dehydrogenase, mitochondrial              | 0.000258 | 0.523265625 | 1.868806 | 0.077867 |
| P30044 | Peroxiredoxin-5, mitochondrial                                           | 0.000254 | 0.355594782 | 1.269981 | 0.052916 |
| P36871 | Phosphoglucomutase-1                                                     | 0.000254 | 0.292946054 | 1.046236 | 0.043593 |
| P00352 | Retinal dehydrogenase 1                                                  | 0.000251 | 0.318074295 | 1.13598  | 0.047332 |
| P01023 | Alpha-2-macroglobulin                                                    | 0.000228 | 0.726955572 | 2.59627  | 0.108178 |
| P10809 | 60 kDa heat shock protein, mitochondrial                                 | 0.000225 | 0.372293589 | 1.32962  | 0.055401 |
| P55072 | Transitional endoplasmic reticulum ATPase                                | 0.000225 | 0.659740279 | 2.356215 | 0.098176 |
| P30711 | Glutathione S-transferase theta-1                                        | 0.000223 | 0.267510002 | 0.955393 | 0.039808 |
| P24539 | ATP synthase subunit b, mitochondrial                                    | 0.000221 | 0.246663984 | 0.880943 | 0.036706 |
| P05091 | Aldehyde dehydrogenase, mitochondrial                                    | 0.000217 | 0.595501213 | 2.12679  | 0.088616 |
| P31040 | Succinate dehydrogenase [ubiquinone] flavoprotein subunit, mitochondrial | 0.000213 | 0.430007068 | 1.53574  | 0.063989 |
| O75155 | Cullin-associated NEDD8-dissociated protein 2                            | 0.000213 | 0.743857341 | 2.656633 | 0.110693 |
| Q9Y623 | Myosin-4                                                                 | 0.0002   | 0.393663816 | 1.405942 | 0.058581 |
| P07437 | Tubulin beta chain                                                       | 0.000199 | 0.302972011 | 1.082043 | 0.045085 |
| P01024 | Complement C3                                                            | 0.000195 | 0.949960215 | 3.392715 | 0.141363 |
| P61026 | Ras-related protein Rab-10                                               | 0.000191 | 0.619483386 | 2.212441 | 0.092185 |
| P07954 | Fumarate hydratase, mitochondrial                                        | 0.00019  | 0.36408906  | 1.300318 | 0.05418  |
| P23297 | Protein S100-A1                                                          | 0.000185 | 0.48711551  | 1.739698 | 0.072487 |
| P13805 | Troponin T, slow skeletal muscle                                         | 0.000185 | 0.435505819 | 1.555378 | 0.064807 |
| P35232 | Prohibitin                                                               | 0.000181 | 0.295775052 | 1.056339 | 0.044014 |
| Q9UBQ7 | Glyoxylate reductase/hydroxypyruvate reductase                           | 0.000174 | 0.349744955 | 1.249089 | 0.052045 |
| P34932 | Heat shock 70 kDa protein 4                                              | 0.000172 | 0.64367901  | 2.298854 | 0.095786 |
| P36542 | ATP synthase subunit gamma, mitochondrial                                | 0.00017  | 0.305384322 | 1.090658 | 0.045444 |
| P42765 | 3-ketoacyl-CoA thiolase, mitochondrial                                   | 0.00017  | 0.251654102 | 0.898765 | 0.037449 |
| Q14974 | Importin subunit beta-1                                                  | 0.000165 | 0.481763253 | 1.720583 | 0.071691 |
| P00491 | Purine nucleoside phosphorylase                                          | 0.000164 | 0.335760558 | 1.199145 | 0.049964 |
| P60174 | Triosephosphate isomerase                                                | 0.000164 | 0.236595403 | 0.844984 | 0.035208 |
| P20618 | Proteasome subunit beta type-1                                           | 0.000161 | 0.227843754 | 0.813728 | 0.033905 |
| P09493 | Tropomyosin alpha-1 chain                                                | 0.000153 | 0.278958091 | 0.996279 | 0.041512 |
| Q8WUM4 | Programmed cell death 6-interacting protein                              | 0.00015  | 0.603563275 | 2.155583 | 0.089816 |
| P18206 | Vinculin                                                                 | 0.000147 | 0.507648244 | 1.813029 | 0.075543 |
| P23528 | Cofilin-1                                                                | 0.000142 | 0.356912637 | 1.274688 | 0.053112 |
| O96000 | NADH dehydrogenase [ubiquinone] 1 beta subcomplex subunit 10             | 0.00014  | 0.207993393 | 0.742834 | 0.030951 |
| P12277 | Creatine kinase B-type                                                   | 0.000139 | 0.36043037  | 1.287251 | 0.053635 |
| P25787 | Proteasome subunit alpha type-2                                          | 0.000135 | 0.397974747 | 1.421338 | 0.059222 |
| P55290 | Cadherin-13                                                              | 0.000132 | 0.308229565 | 1.10082  | 0.045867 |
| Q9UHG3 | Prenylcysteine oxidase 1                                                 | 0.000131 | 0.415393662 | 1.483549 | 0.061815 |
| O95831 | Apoptosis-inducing factor 1, mitochondrial                               | 0.000127 | 0.254173999 | 0.907764 | 0.037824 |
| O75390 | Citrate synthase, mitochondrial                                          | 0.000126 | 0.29197101  | 1.042754 | 0.043448 |

|        |                                                                     |          |             |          |          |
|--------|---------------------------------------------------------------------|----------|-------------|----------|----------|
| Q16718 | NADH dehydrogenase [ubiquinone] 1 alpha subcomplex subunit 5        | 0.000124 | 0.452041675 | 1.614435 | 0.067268 |
| P38646 | Stress-70 protein, mitochondrial                                    | 0.000124 | 0.673320921 | 2.404718 | 0.100197 |
| P21399 | Cytoplasmic aconitate hydratase                                     | 0.000121 | 0.382420193 | 1.365786 | 0.056908 |
| P35270 | Sepiapterin reductase                                               | 0.00012  | 0.210718811 | 0.752567 | 0.031357 |
| P31946 | 14-3-3 protein beta/alpha                                           | 0.00012  | 0.471346099 | 1.683379 | 0.070141 |
| P04080 | Cystatin-B                                                          | 0.000117 | 0.181713523 | 0.648977 | 0.027041 |
| P49821 | NADH dehydrogenase [ubiquinone] flavoprotein 1, mitochondrial       | 0.000113 | 0.332901777 | 1.188935 | 0.049539 |
| Q9Y6M9 | NADH dehydrogenase [ubiquinone] 1 beta subcomplex subunit 9         | 0.000113 | 0.257383986 | 0.919229 | 0.038301 |
| P13693 | Translationally-controlled tumor protein                            | 0.000112 | 0.85558437  | 3.055658 | 0.127319 |
| P02790 | Hemopexin                                                           | 0.000111 | 0.708844709 | 2.531588 | 0.105483 |
| P09972 | Fructose-bisphosphate aldolase C                                    | 0.000106 | 0.273344692 | 0.976231 | 0.040676 |
| Q9Y6B6 | GTP-binding protein SAR1b                                           | 0.000106 | 0.688751461 | 2.459827 | 0.102493 |
| Q16851 | UTP--glucose-1-phosphate uridylyltransferase                        | 0.000105 | 0.487612909 | 1.741475 | 0.072561 |
| P51649 | Succinate-semialdehyde dehydrogenase, mitochondrial                 | 0.000101 | 0.173987854 | 0.621385 | 0.025891 |
| Q08043 | Alpha-actinin-3                                                     | 0.0001   | 0.193089542 | 0.689606 | 0.028734 |
| P11177 | Pyruvate dehydrogenase E1 component subunit beta, mitochondrial     | 9.87E-05 | 0.254716015 | 0.9097   | 0.037904 |
| P21266 | Glutathione S-transferase Mu 3                                      | 9.6E-05  | 0.236837869 | 0.84585  | 0.035244 |
| P08133 | Annexin A6                                                          | 9.5E-05  | 0.357826608 | 1.277952 | 0.053248 |
| Q06830 | Peroxiredoxin-1                                                     | 9.33E-05 | 0.37550443  | 1.341087 | 0.055879 |
| Q13200 | 26S proteasome non-ATPase regulatory subunit 2                      | 9.2E-05  | 0.747955879 | 2.671271 | 0.111303 |
| Q9NTK5 | Obg-like ATPase 1                                                   | 9.07E-05 | 0.284742546 | 1.016938 | 0.042372 |
| Q9NSE4 | Isoleucine--tRNA ligase, mitochondrial                              | 8.85E-05 | 0.381092317 | 1.361044 | 0.05671  |
| Q96AB3 | Isochorismatase domain-containing protein 2, mitochondrial          | 8.63E-05 | 0.264893074 | 0.946047 | 0.039419 |
| P12829 | Myosin light chain 4                                                | 8.6E-05  | 0.074446184 | 0.265879 | 0.011078 |
| P09211 | Glutathione S-transferase P                                         | 8.59E-05 | 0.280520831 | 1.00186  | 0.041744 |
| Q05639 | Elongation factor 1-alpha 2                                         | 8.53E-05 | 0.477670827 | 1.705967 | 0.071082 |
| P63104 | 14-3-3 protein zeta/delta                                           | 8.48E-05 | 0.426318684 | 1.522567 | 0.06344  |
| P78417 | Glutathione S-transferase omega-1                                   | 7.98E-05 | 0.203343331 | 0.726226 | 0.030259 |
| O75208 | Ubiquinone biosynthesis protein COQ9, mitochondrial                 | 7.58E-05 | 0.271739694 | 0.970499 | 0.040437 |
| P31939 | Bifunctional purine biosynthesis protein PURH                       | 7.46E-05 | 0.252761516 | 0.90272  | 0.037613 |
| P28161 | Glutathione S-transferase Mu 2                                      | 7.29E-05 | 0.219095041 | 0.782482 | 0.032603 |
| P14927 | Cytochrome b-c1 complex subunit 7                                   | 6.97E-05 | 0.416199772 | 1.486428 | 0.061934 |
| P19237 | Troponin I, slow skeletal muscle                                    | 6.74E-05 | 0.499045399 | 1.782305 | 0.074263 |
| P30837 | Aldehyde dehydrogenase X, mitochondrial                             | 6.63E-05 | 0.569821358 | 2.035076 | 0.084795 |
| P30042 | ES1 protein homolog, mitochondrial                                  | 6.62E-05 | 0.299382214 | 1.069222 | 0.044551 |
| Q8TCA0 | Leucine-rich repeat-containing protein 20                           | 6.04E-05 | 0.380413711 | 1.35862  | 0.056609 |
| Q86Y39 | NADH dehydrogenase [ubiquinone] 1 alpha subcomplex subunit 11       | 5.91E-05 | 0.275273649 | 0.98312  | 0.040963 |
| P01019 | Angiotensinogen                                                     | 5.84E-05 | 0.591606027 | 2.112879 | 0.088037 |
| P48163 | NADP-dependent malic enzyme                                         | 5.58E-05 | 0.267765169 | 0.956304 | 0.039846 |
| Q04446 | 1,4-alpha-glucan-branching enzyme                                   | 5.52E-05 | 0.562872073 | 2.010257 | 0.083761 |
| P10768 | S-formylglutathione hydrolase                                       | 5.47E-05 | 0.212044068 | 0.7573   | 0.031554 |
| P45974 | Ubiquitin carboxyl-terminal hydrolase 5                             | 5.44E-05 | 0.450973024 | 1.610618 | 0.067109 |
| O75891 | Cytosolic 10-formyltetrahydrofolate dehydrogenase                   | 5.32E-05 | 0.485486954 | 1.733882 | 0.072245 |
| P13535 | Myosin-8                                                            | 5.22E-05 | 0.34489908  | 1.231782 | 0.051324 |
| Q9GZV1 | Ankyrin repeat domain-containing protein 2                          | 4.62E-05 | 0.487245533 | 1.740163 | 0.072507 |
| P61970 | Nuclear transport factor 2                                          | 4.37E-05 | 0.356346596 | 1.272666 | 0.053028 |
| Q9Y281 | Cofilin-2                                                           | 4.25E-05 | 0.355095554 | 1.268198 | 0.052842 |
| P09960 | Leukotriene A-4 hydrolase                                           | 4.17E-05 | 0.317492791 | 1.133903 | 0.047246 |
| P52179 | Myomesin-1                                                          | 4.12E-05 | 0.337731209 | 1.206183 | 0.050258 |
| P52758 | Ribonuclease UK114                                                  | 4.05E-05 | 0.153202    | 0.54715  | 0.022798 |
| P30038 | Delta-1-pyrroline-5-carboxylate dehydrogenase, mitochondrial        | 3.84E-05 | 0.272641993 | 0.973721 | 0.040572 |
| O75923 | Dysferlin                                                           | 3.69E-05 | 0.315306915 | 1.126096 | 0.046921 |
| O75431 | Metaxin-2                                                           | 3.65E-05 | 0.225241115 | 0.804433 | 0.033518 |
| Q99460 | 26S proteasome non-ATPase regulatory subunit 1                      | 3.59E-05 | 0.572840081 | 2.045857 | 0.085244 |
| P18669 | Phosphoglycerate mutase 1                                           | 3.56E-05 | 0.262790444 | 0.938537 | 0.039106 |
| P19367 | Hexokinase-1                                                        | 3.48E-05 | 0.474006155 | 1.692879 | 0.070537 |
| Q07021 | Complement component 1 Q subcomponent-binding protein, mitochondria | 3.46E-05 | 0.44297992  | 1.582071 | 0.06592  |
| Q16836 | Hydroxyacyl-coenzyme A dehydrogenase, mitochondrial                 | 3.44E-05 | 0.284551601 | 1.016256 | 0.042344 |
| P10599 | Thioredoxin                                                         | 3.32E-05 | 0.237155631 | 0.846984 | 0.035291 |
| Q9P2R7 | Succinyl-CoA ligase [ADP-forming] subunit beta, mitochondrial       | 3.23E-05 | 0.421861365 | 1.506648 | 0.062777 |
| Q86TD4 | Sarcalumenin                                                        | 3.23E-05 | 0.323275208 | 1.154554 | 0.048106 |
| O14983 | Sarcoplasmic/endoplasmic reticulum calcium ATPase 1                 | 3.16E-05 | 0.399435873 | 1.426557 | 0.05944  |
| Q5VXT5 | Synaptophysin-like protein 2                                        | 2.8E-05  | 0.086872245 | 0.310258 | 0.012927 |

|        |                                                                          |          |             |          |          |
|--------|--------------------------------------------------------------------------|----------|-------------|----------|----------|
| O43598 | Deoxyribonucleoside 5'-monophosphate N-glycosidase                       | 2.79E-05 | 0.395999741 | 1.414285 | 0.058929 |
| P17612 | cAMP-dependent protein kinase catalytic subunit alpha                    | 2.49E-05 | 0.370308582 | 1.322531 | 0.055105 |
| P50993 | Sodium/potassium-transporting ATPase subunit alpha-2                     | 2.47E-05 | 0.678203489 | 2.422155 | 0.100923 |
| Q16891 | Mitochondrial inner membrane protein                                     | 2.45E-05 | 0.264063013 | 0.943082 | 0.039295 |
| P54727 | UV excision repair protein RAD23 homolog B                               | 2.44E-05 | 0.688354131 | 2.458408 | 0.102434 |
| P51884 | Lumican                                                                  | 2.36E-05 | 0.398996427 | 1.424987 | 0.059374 |
| P08670 | Vimentin                                                                 | 2.23E-05 | 0.838467287 | 2.994526 | 0.124772 |
| O60763 | General vesicular transport factor p115                                  | 2.17E-05 | 0.750286752 | 2.679596 | 0.11165  |
| O43707 | Alpha-actinin-4                                                          | 2.12E-05 | 0.423798788 | 1.513567 | 0.063065 |
| O75251 | NADH dehydrogenase [ubiquinone] iron-sulfur protein 7, mitochondrial     | 2.1E-05  | 0.65660904  | 2.345032 | 0.09771  |
| Q00325 | Phosphate carrier protein, mitochondrial                                 | 2.08E-05 | 0.301238067 | 1.07585  | 0.044827 |
| P00441 | Superoxide dismutase [Cu-Zn]                                             | 2.06E-05 | 0.265763186 | 0.949154 | 0.039548 |
| O75083 | WD repeat-containing protein 1                                           | 1.91E-05 | 0.214475413 | 0.765984 | 0.031916 |
| Q9UN36 | Protein NDRG2                                                            | 1.88E-05 | 0.692342583 | 2.472652 | 0.103027 |
| Q9NZ08 | Endoplasmic reticulum aminopeptidase 1                                   | 1.69E-05 | 0.567279205 | 2.025997 | 0.084417 |
| Q8WW59 | SPRY domain-containing protein 4                                         | 1.54E-05 | 0.419689377 | 1.498891 | 0.062454 |
| P42704 | Leucine-rich PPR motif-containing protein, mitochondrial                 | 1.48E-05 | 0.760898971 | 2.717496 | 0.113229 |
| Q93100 | Phosphorylase b kinase regulatory subunit beta                           | 1.42E-05 | 0.406294345 | 1.451051 | 0.06046  |
| O60662 | Kelch repeat and BTB domain-containing protein 10                        | 1.37E-05 | 0.481899573 | 1.72107  | 0.071711 |
| P02549 | Spectrin alpha chain, erythrocyte                                        | 1.28E-05 | 0.22937254  | 0.819188 | 0.034133 |
| P19404 | NADH dehydrogenase [ubiquinone] flavoprotein 2, mitochondrial            | 1.28E-05 | 0.434375431 | 1.551341 | 0.064639 |
| P46020 | Phosphorylase b kinase regulatory subunit alpha, skeletal muscle isoform | 1.19E-05 | 0.361864134 | 1.292372 | 0.053849 |
| Q00610 | Clathrin heavy chain 1                                                   | 1.17E-05 | 0.719345611 | 2.569091 | 0.107045 |
| Q04917 | 14-3-3 protein eta                                                       | 1.05E-05 | 0.505842639 | 1.806581 | 0.075274 |
| P08238 | Heat shock protein HSP 90-beta                                           | 8.65E-06 | 0.907438827 | 3.240853 | 0.135036 |
| Q16531 | DNA damage-binding protein 1                                             | 7.35E-06 | 0.671022808 | 2.39651  | 0.099855 |
| Q9Y490 | Talin-1                                                                  | 6.07E-06 | 0.729269393 | 2.604534 | 0.108522 |
| Q86VP6 | Cullin-associated NEDD8-dissociated protein 1                            | 5.83E-06 | 0.425156847 | 1.518417 | 0.063267 |
| O75298 | Reticulon-2                                                              | 5.83E-06 | 0.317435117 | 1.133697 | 0.047237 |
| Q5VYK3 | Proteasome-associated protein ECM29 homolog                              | 5.75E-06 | 0.852249826 | 3.043749 | 0.126823 |
| Q14697 | Neutral alpha-glucosidase AB                                             | 5.13E-06 | 0.348496184 | 1.244629 | 0.05186  |
| P49748 | Very long-chain specific acyl-CoA dehydrogenase, mitochondrial           | 4.53E-06 | 0.470783329 | 1.681369 | 0.070057 |
| P13533 | Myosin-6                                                                 | 3.99E-06 | 0.433072474 | 1.546687 | 0.064445 |
| P21817 | Ryanodine receptor 1                                                     | 1.73E-06 | 0.431340096 | 1.5405   | 0.064188 |
| P04114 | Apolipoprotein B-100                                                     | 8.48E-07 | 0.983398346 | 3.512137 | 0.146339 |
